# Supplementary material for: Study on the preparation and performance of functional cotton fabrics based on zeolite-like imidazole organic frameworks (ZIFs)
Source: Research Square preprint supplement (doi:10.21203/rs.3.rs-6676630/v1), 2025-06-17
Supplement: Supplementary file 1 [file fc3279c4d0c4629babe0e693.xlsx]

## Sheet: Sheet1
Sample	T(UVA)	T(UVB)	UPF
Cotton	0.1475	0.1547	5
ZIF-8@Cotton	0.0005	0.0005	＞50
Ag/ZIF-8@Cotton	0.0005	0.0005	＞50
